# Supplementary material
Source: MDPI journal article supplement (https://www.mdpi.com/2073-4352/12/1/109)
Supplement: s1 [file s1]

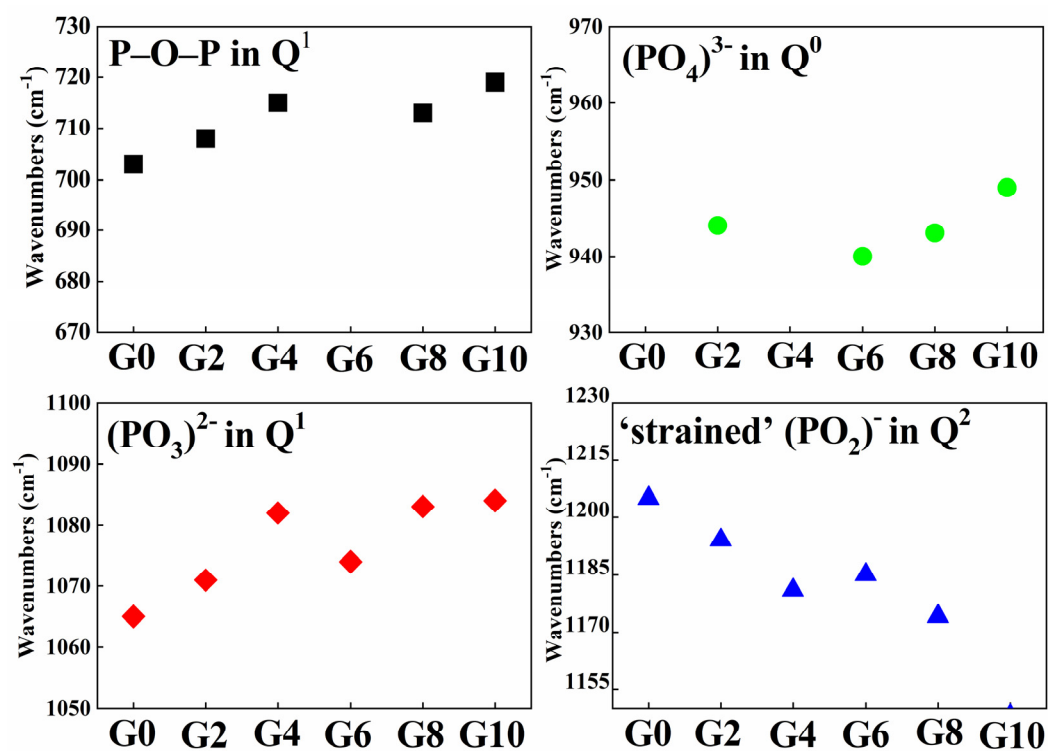

**Figure S1.** The frequencies of Raman spectra for all Y-doped glass samples.

**Table S1.** The DSC parameters of all glass samples.

| DSC Parameters    | G0  | G2  | G4  | G6  | G8  | G10 |
|-------------------|-----|-----|-----|-----|-----|-----|
| $T_g$ (°C)        | 570 | 571 | 566 | 579 | 577 | 574 |
| $T_{p1}$ (°C)     | 697 | 675 | 666 | 676 | 679 | 669 |
| $T_{p2}$ (°C)     | 724 | 693 | 681 | 694 | 691 | 685 |
| $T_{p1}-T_g$ (°C) | 127 | 105 | 100 | 97  | 102 | 95  |

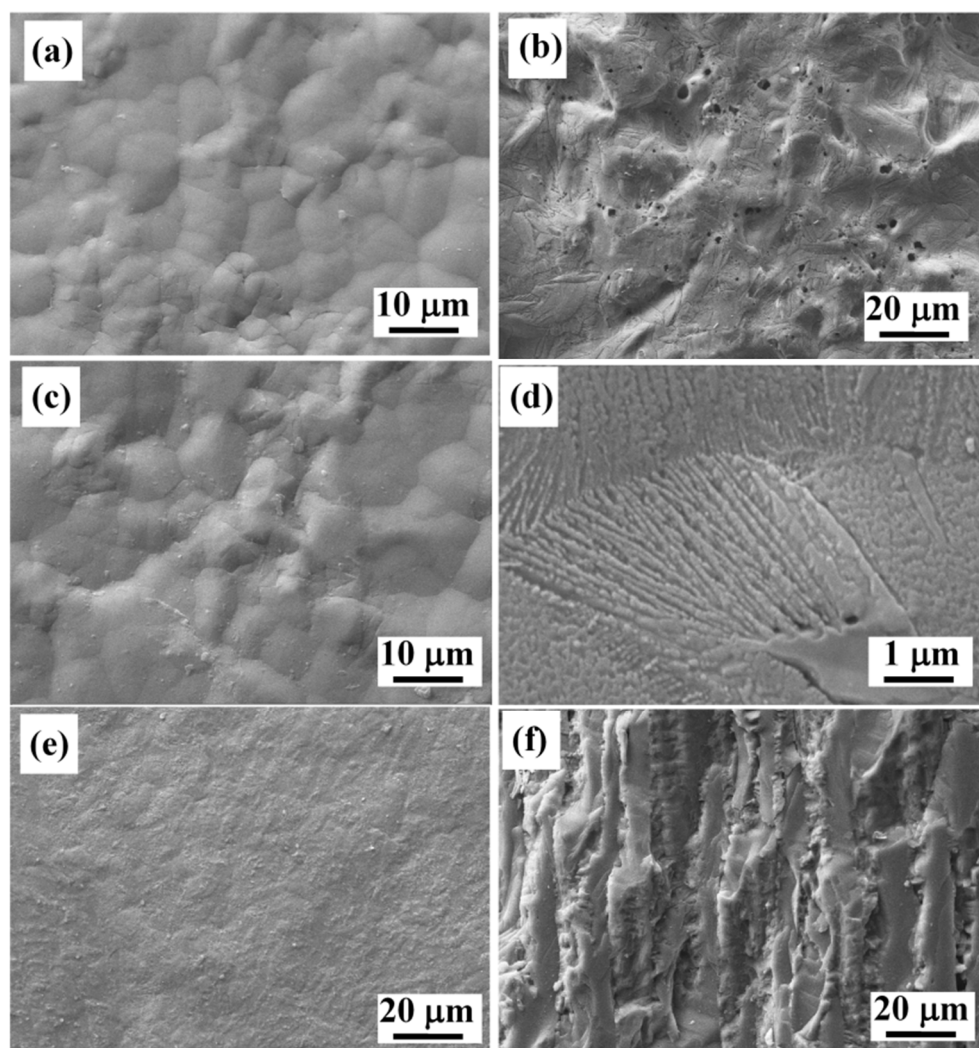

**Figure S2.** SEM images of the GC0 sample at different crystallization times of (a,b) 2 h, (c,d) 5 h, and (e,f) 10 h. The samples (b,d,f) were etched in 40% HF for 15–20 s.
